# Supplementary material for: Deep-sea Hydrothermal Vent Bacteria as a Source of Glycosaminoglycan-Mimetic Exopolysaccharides
Source: PubMed Central journal article supplement (PMC6539532; doi:10.3390/molecules24091703), 2019-05-01
Supplement: molecules-24-01703-s001.pdf [file molecules-24-01703-s001.pdf]

Figure S1. Example of electrophoretic analysis on agarose gel with Stains All staining performed on culture broth supernatants recovered after 48h of incubation of 21 deep-sea hydrothermal vent strains in Zobell-like medium supplemented with glucose during the screening step. GY785 EPS and HE800 EPS were used as references.

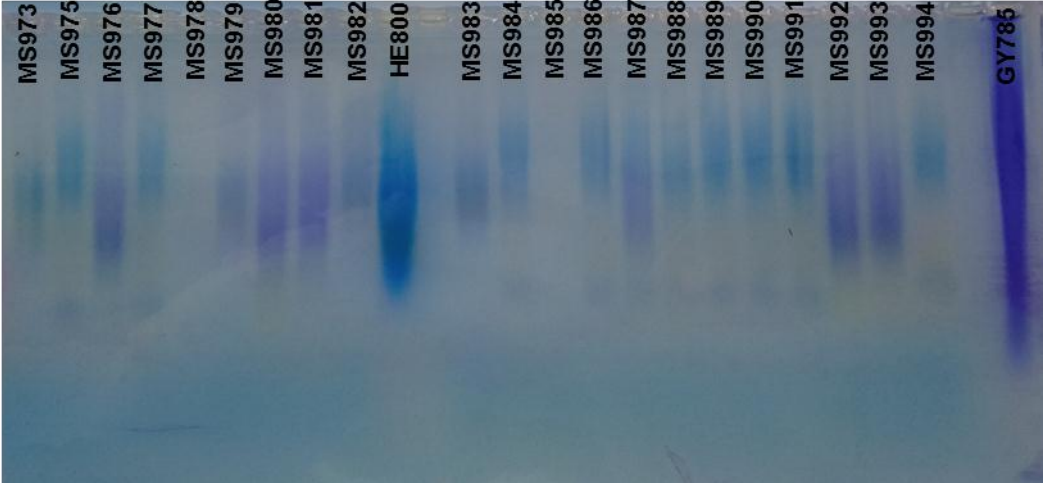

Table S1. Deep-sea hydrothermal vent strains selected for EPS production at laboratory scale.

| Strain | Cruise     | Cruise year | Cruise site                                   | Sample location                                 | EPS production |
|--------|------------|-------------|-----------------------------------------------|-------------------------------------------------|----------------|
| BI6    | Biolau     | 1989        | Southwestern Pacific Ocean (Lau Basin)        | scratched shell of mussel                       | Yes            |
| BI15   | Biolau     | 1989        | Southwestern Pacific Ocean (Lau Basin)        | intervalvar water of mussel                     | Yes            |
| BI20   | Biolau     | 1989        | Southwestern Pacific Ocean (Lau Basin)        | sampling water at the base of a white smoker    | Yes            |
| BI27   | Biolau     | 1989        | Southwestern Pacific Ocean (Lau Basin)        | hydrothermal fluid above a white smoker         | Yes            |
| BI31   | Biolau     | 1989        | Southwestern Pacific Ocean (Lau Basin)        | sampling water at the way out of a black smoker | Yes            |
| BI54   | Biolau     | 1989        | Southwestern Pacific Ocean (Lau Basin)        | unknown                                         | Yes            |
| BI77   | Biolau     | 1989        | Southwestern Pacific Ocean (Lau Basin)        | unknown                                         | Yes            |
| BI93   | Biolau     | 1989        | Southwestern Pacific Ocean (Lau Basin)        | unknown                                         | Yes            |
| BI112  | Biolau     | 1989        | Southwestern Pacific Ocean (Lau Basin)        | hydrothermal fluid above a white smoker         | Yes            |
| BI121  | Biolau     | 1989        | Southwestern Pacific Ocean (Lau Basin)        | hydrothermal fluid in titane tube               | Low amount     |
| BI134  | Biolau     | 1989        | Southwestern Pacific Ocean (Lau Basin)        | scratched shell of mussel                       | Yes            |
| BI145  | Biolau     | 1989        | Southwestern Pacific Ocean (Lau Basin)        | intervalvar water of mussel                     | Yes            |
| BI189  | Biolau     | 1989        | Southwestern Pacific Ocean (Lau Basin)        | crushed foot of Alviniconcha                    | Yes            |
| BI193  | Biolau     | 1989        | Southwestern Pacific Ocean (Lau Basin)        | crushed gills of Alviniconcha                   | Yes            |
| ST265  | Starmer    | 1989        | Southwestern Pacific Ocean (North Fiji Basin) | intervalvar water of mussel                     | Low amount     |
| ST279  | Starmer    | 1989        | Southwestern Pacific Ocean (North Fiji Basin) | crushed gills of Trochidae                      | Low amount     |
| ST285  | Starmer    | 1989        | Southwestern Pacific Ocean (North Fiji Basin) | crushed digestive mass of Trochidae             | Low amount     |
| ST308  | Starmer    | 1989        | Southwestern Pacific Ocean (North Fiji Basin) | intervalvar water of mussel                     | Yes            |
| ST352  | Starmer    | 1989        | Southwestern Pacific Ocean (North Fiji Basin) | crushed gills of Trochidae                      | Yes            |
| BI370  | Biolau     | 1989        | Southwestern Pacific Ocean (Lau Basin)        | crushed gills of Alviniconcha                   | Yes            |
| ST421  | Starmer    | 1989        | Southwestern Pacific Ocean (North Fiji Basin) | intervalvar water of mussel                     | Yes            |
| ST422  | Starmer    | 1989        | Southwestern Pacific Ocean (North Fiji Basin) | crushed digestive mass of mussel                | Yes            |
| ST427  | Starmer    | 1989        | Southwestern Pacific Ocean (North Fiji Basin) | crushed digestive mass of Alviniconcha          | Yes            |
| BI724  | Biolau     | 1989        | Southwestern Pacific Ocean (Lau Basin)        | unknown                                         | Yes            |
| AL749  | MMVT       | 1990        | East Pacific Ridge (EPR 11°N, 13°N or 21°N)   | unknown                                         | Yes            |
| MA882  | Marvel     | 1993        | Mid Atlantic Ridge (Snake Pit or Tag)         | unknown                                         | Yes            |
| MA886  | Marvel     | 1993        | Mid Atlantic Ridge (Snake Pit or Tag)         | shrimp                                          | Low amount     |
| MA894  | Marvel     | 1993        | Mid Atlantic Ridge (Snake Pit or Tag)         | unknown                                         | Yes            |
| MS911  | Microsmoke | 1995        | Mid Atlantic Ridge (Snake Pit)                | colonization module                             | Yes            |
| MS937  | Microsmoke | 1995        | Mid Atlantic Ridge (Snake Pit)                | colonization module                             | Yes            |
| MS944  | Microsmoke | 1995        | Mid Atlantic Ridge (Snake Pit)                | colonization module                             | Yes            |
| MS950  | Microsmoke | 1995        | Mid Atlantic Ridge (Snake Pit)                | colonization module                             | Yes            |
| MS969  | Microsmoke | 1995        | Mid Atlantic Ridge (Snake Pit)                | colonization module                             | Yes            |
| AT1213 | Atos       | 2001        | Mid Atlantic Ridge (Rainbow)                  | crushed Rimicaris                               | Yes            |
| AT1217 | Atos       | 2001        | Mid Atlantic Ridge (Rainbow)                  | crushed Rimicaris                               | Low amount     |
| AT1219 | Atos       | 2001        | Mid Atlantic Ridge (Rainbow)                  | active chimney                                  | Yes            |
| PH1226 | Phare      | 2002        | East Pacific Ridge (EPR 13°N)                 | unknown                                         | Yes            |
| AT1240 | Atos       | 2001        | Mid Atlantic Ridge (Rainbow)                  | crushed Rimicaris                               | Low amount     |

Table S2. Recovery yield, weight-average molecular weight (Mw), polydispersity index (Ip) and chemical composition (protein, sulfur and monosaccharide contents) of 31 EPS produced at laboratory scale. GY785 EPS and HE800 EPS were used as references.

| Strain | Yield (g/L) | Mw (10 <sup>6</sup> g/mol) | Ip   | Protein (wt%) | Sulfur (wt%) | Monosaccharide composition (wt%) |     |     |      |      |      |      |        |        |
|--------|-------------|----------------------------|------|---------------|--------------|----------------------------------|-----|-----|------|------|------|------|--------|--------|
|        |             |                            |      |               |              | Rha                              | Fuc | Man | Gal  | Glc  | GlcA | GalA | GlcNAc | GalNAc |
| GY785  | 0,55        | 3,6                        | 1,05 | 15            | 3            | 0,7                              | 0,3 | 1,8 | 17,6 | 22,9 | 9,5  | 4,9  | 0      | 0      |
| HE800  | 0,35        | 1,8                        | 1,5  | 1,9           | 0            | 0                                | 0   | 0   | 0    | 0    | 17,1 | 0    | 26,2   | 8,4    |
| BI6    | 0,47        | 2,6                        | 1,03 | 3             | 0            | 0                                | 0   | 0   | 0    | 0    | 6,9  | 18   | 11,2   | 4,1    |
| BI15   | 0,68        | 2,5                        | 1,05 | 3             | 0            | 0                                | 0   | 0   | 0    | 0    | 10,4 | 7,6  | 11,6   | 11,2   |
| BI20   | 0,58        | 2,3                        | 1,03 | 6             | 0            | 0                                | 0   | 0   | 0    | 0    | 4,1  | 18,7 | 13,3   | 1,6    |
| BI27   | 0,57        | 2,5                        | 1,04 | 3             | 0            | 0                                | 0   | 0   | 0    | 0    | 10,8 | 7,8  | 11,5   | 12,4   |
| BI31   | 0,27        | 3,2                        | 1,2  | 5             | 0            | 0                                | 0   | 0   | 0    | 0    | 6,1  | 11,6 | 8,2    | 2,9    |
| BI54   | 0,42        | 2,5                        | 1,03 | 5             | 0            | 0                                | 0   | 0   | 0    | 0    | 11,6 | 8,6  | 8,3    | 7,7    |
| BI77   | 0,32        | 2,4                        | 1,04 | 5             | 0            | 0                                | 0   | 0   | 0    | 0    | 7,6  | 8,2  | 9      | 12,6   |
| BI93   | 0,42        | 2,4                        | 1,02 | 6             | 0            | 0                                | 0   | 0   | 0    | 0    | 8,4  | 7,9  | 9,6    | 13,6   |
| BI112  | 0,34        | 2,7                        | 1,07 | 5             | 0            | 0                                | 0   | 0   | 0    | 0    | 2,3  | 10,9 | 7,1    | 0      |
| BI134  | 0,6         | 1,4                        | 1,1  | 4             | 0            | 0                                | 0   | 0   | 0    | 0    | 8,9  | 6,6  | 11,4   | 18,3   |
| BI145  | 0,49        | 2,4                        | 1,03 | 4             | 0            | 0                                | 0   | 0   | 0    | 0    | 7,8  | 6,1  | 8,5    | 14,7   |
| BI189  | 0,6         | 2,3                        | 1,04 | 4             | 0            | 0                                | 0   | 0   | 0    | 0    | 5,6  | 3,2  | 6,1    | 0      |
| BI193  | 0,84        | 2,3                        | 1,1  | 4             | 0            | 0                                | 0   | 0   | 0    | 0    | 8    | 5,7  | 11     | 9,5    |
| ST308  | 1,03        | 2,3                        | 1,04 | 3             | 0            | 0                                | 0   | 0   | 0    | 0    | 0    | 18,1 | 8      | 0      |
| ST352  | 0,67        | 3,0                        | 1,05 | 4             | 0            | 0                                | 0   | 0   | 0    | 0    | 0    | 17,5 | 6,5    | 0      |
| BI370  | 1,25        | 2,8                        | 1,03 | 4             | 0            | 0                                | 0   | 0   | 0    | 0    | 0    | 19   | 4,2    | 0      |
| ST421  | 0,83        | 2,5                        | 1,2  | 12            | 2            | 2,3                              | 2,2 | 0   | 13,9 | 21,8 | 6    | 1,7  | 0      | 0      |
| ST422  | 0,7         | 2,6                        | 1,07 | 1             | 0            | 0                                | 0   | 0   | 0    | 0    | 24,3 | 0    | 21,4   | 16,5   |
| ST427  | 0,76        | 2,4                        | 1,02 | 2             | 0            | 0                                | 0   | 0   | 0    | 0    | 21,9 | 0    | 19,4   | 15,8   |
| BI724  | 0,58        | 2,2                        | 1,03 | 9             | 0            | 0                                | 0   | 3,1 | 2,3  | 6,6  | 5,6  | 1,8  | 7,4    | 1,7    |
| AL749  | 0,68        | 3,0                        | 1,01 | 6             | 0            | 0                                | 0   | 0   | 2,5  | 5,8  | 2,8  | 0    | 9,7    | 6,4    |
| MA882  | 0,12        | 5,1                        | 1,05 | 6             | 0            | 0                                | 0   | 0   | 0    | 0    | 7,1  | 1,1  | 6,9    | 3,2    |
| MA894  | 0,38        | 2,8                        | 1,04 | 6             | 0            | 0                                | 0   | 0   | 0    | 0    | 10,6 | 8,8  | 11,1   | 14,8   |
| MS911  | 0,3         | 3,0                        | 1,05 | 4             | 0            | 0                                | 0   | 0   | 0    | 0    | 3,6  | 13,6 | 12,6   | 3      |
| MS937  | 0,4         | 3,1                        | 1,02 | 4             | 0            | 0                                | 0   | 0   | 0    | 0    | 18,5 | 3,3  | 18,3   | 13,1   |
| MS944  | 0,45        | 1,9                        | 1,1  | 4             | 0            | 0                                | 0   | 0   | 0    | 0    | 3,4  | 17,2 | 11,5   | 4,3    |
| MS950  | 0,92        | 3,0                        | 1,03 | 16            | 0            | 0                                | 0   | 0   | 5,9  | 11   | 6,4  | 1,8  | 4,5    | 1,6    |
| MS969  | 0,26        | 2,8                        | 1,24 | 13            | 3            | 11,1                             | 0   | 0   | 1,8  | 15,9 | 5,6  | 0    | 0      | 0      |
| AT1213 | 0,77        | 2,1                        | 1,09 | 4             | 0            | 0                                | 0   | 0   | 10,6 | 2    | 9,3  | 5,3  | 10,3   | 3,1    |
| AT1219 | 0,44        | 3,2                        | 1,16 | 7             | 0            | 0                                | 0   | 0   | 12,8 | 5,4  | 13   | 6,1  | 10,5   | 17,6   |
| PH1226 | 0,29        | 2,2                        | 1,06 | 5             | 0            | 0                                | 0   | 0   | 12,8 | 4,8  | 11,6 | 5,8  | 10,5   | 14,8   |
